# Supplementary material for: Safety and Immunogenicity Following the Second and Third Doses of the BNT162b2 mRNA COVID-19 Vaccine in Adolescents with Juvenile-Onset Autoimmune Inflammatory Rheumatic Diseases: A Prospective Multicentre Study
Source: MDPI journal article supplement (doi:10.3390/vaccines11040819), 2023-04-10
Supplement: s1 [file s1]

## SUPPLEMENTARY FILE

**Table S1.** Treatments per diagnosis among adolescents with AIIRD

| AIIRD diagnosis                  | csDMARDs  | bDMARDs   | MTX       | MMF       | TNFi      | IL6i     | Anti-CD20 | Steroids  | Plaquenil | JAKi    |
|----------------------------------|-----------|-----------|-----------|-----------|-----------|----------|-----------|-----------|-----------|---------|
| All AIIRD, N=124 (%)             | 57 (46.0) | 48 (38.7) | 27 (21.8) | 13 (10.5) | 39 (31.5) | 7 (5.7)  | 4 (3.2)   | 21 (16.9) | 26 (21.0) | 5 (4.0) |
| JIA, n=54 (%)                    | 24 (44.4) | 26 (48.2) | 19 (35.2) | 1 (1.9)   | 23 (42.6) | 6 (11.1) | 0 (0)     | 3 (5.6)   | 0 (0)     | 4 (7.4) |
| SLE (n=20)                       | 20 (100)  | 1 (5)     | 0 (0)     | 8 (40)    | 0 (0)     | 0 (0)    | 1 (5)     | 11 (6)    | 20 (100)  | 0       |
| Autoinflammatory diseases (n=11) | 1 (9.1)   | 3 (27.3)  | 0 (0)     | 0 (0)     | 2 (18.2)  | 0 (0)    | 0 (0)     | 0 (0)     | 1 (9.1)   | 0       |
| Scleroderma (n=7)                | 4 (57.1)  | 1 (14.3)  | 2 (28.6)  | 4 (57.1)  | 0         | 0        | 1 (14.3)  | 1 (14.3)  | 2 (28.6)  | 0       |
| Vasculitis (n=6)                 | 0         | 3 (50)    | 0         | 0         | 1 (16.7)  | 0 (0)    | 2 (33.3)  | 1 (16.7)  | 0         | 0       |
| Uveitis (n=8)                    | 3 (37.5)  | 5 (62.5)  | 3 (37.5)  | 0         | 5 (62.5)  | 1 (12.5) | 0         | 2 (3)     | 0         | 0       |
| Myositis (n=5)                   | 3 (60)    | 0         | 2 (40)    | 0         | 0         | 0        | 0         | 2 (40)    | 3 (60)    | 1 (20)  |
| IBD-related arthritis (n=7)      | 1 (14.3)  | 7 (100)   | 1 (14.3)  | 0         | 7 (100)   | 0        | 0         | 0         | 0         | 0       |

AIIRD, autoimmune inflammatory rheumatic disease; csDMARDs, conventional synthetic disease modifying antirheumatic drugs; bDMARDs, biologic disease modifying antirheumatic drugs; MTX, methotrexate; MMF, mycophenolate mofetil; TNFi, tumour necrosis factor  $\alpha$  inhibitors; IL, interleukin; JAKi, janus kinase inhibitors; JIA, juvenile idiopathic arthritis; SLE, systemic lupus erythematosus, IBD, inflammatory bowel disease.

**Table S2.** Anti-S1/S2 IgG titres following the second and third BNT162b2 vaccine dose in adolescents with AIIRD grouped by disease type and controls

| Immuno-modulatory treatment, N | 6 weeks after vaccination  |                                              | 6 months after 2nd vaccination |                                              | After 3rd vaccination      |                                              |
|--------------------------------|----------------------------|----------------------------------------------|--------------------------------|----------------------------------------------|----------------------------|----------------------------------------------|
|                                | Seropositivity rate, n (%) | Anti S1/S2 IgG titre, mean $\pm$ SD (BAU/ml) | Seropositivity rate, n (%)     | Anti S1/S2 IgG titre, mean $\pm$ SD (BAU/ml) | Seropositivity rate, n (%) | Anti S1/S2 IgG titre, mean $\pm$ SD (BAU/ml) |
| Healthy, n=23                  | 23 (100)                   | 388.3 (561)                                  | 14 (100)                       | 212.93 (93.7)                                | 9 (100)                    | 400 (0)                                      |
| AIIRD, n=45                    | 41 (91)                    | 243.09 (140.84)                              | 41 (87)                        | 216.91 (157.6)                               | 13 (100)                   | 355.78 (126.4)                               |
| Vasculitis, n=4                | 3 (75)                     | 218.15 (203.17)                              | 3 (75)                         | 129.8 (182.41)                               | 1 (100)                    | 383 (NA)                                     |
| SLE, n=8                       | 8 (100)                    | 224.09 (161.66)                              | 8 (89)                         | 152.77 (149.16)                              | 2 (100)                    | 209.5 (269.41)                               |
| Myositis, n=1                  | 1 (100)                    | 187 (NA)                                     | 2 (100)                        | 400 (0)                                      | 0 (0)                      | NaN (NA)                                     |
| Scleroderma, n=4               | 3 (75)                     | 189.33 (191.75)                              | 1 (50)                         | 109 (NA)                                     | 2 (100)                    | 400 (NA)                                     |
| JIA, n=15                      | 14 (93)                    | 255.04 (142.8)                               | 20 (87)                        | 242.75 (164.22)                              | 5 (100)                    | 400 (0)                                      |
| Uveitis, n=3                   | 3 (100)                    | 250 (137.15)                                 | 0 (0)                          | NaN (NA)                                     | 2 (100)                    | 400 (0)                                      |
| IBD, n=6                       | 6 (100)                    | 250.77 (126.03)                              | 1 (100)                        | 89 (NA)                                      | 0 (0)                      | NaN (NA)                                     |
| Autoinflammatory diseases, n=3 | 2 (67)                     | 312 (22.63)                                  | 4 (100)                        | 297.67 (88.62)                               | 0 (NaN)                    | NaN (NA)                                     |
| Other, n=1                     | 1 (100)                    | 400 (NA)                                     | 2 (100)                        | 312.5 (123.74)                               | 1 (100%)                   | 400 (NA)                                     |

AIIRD, autoimmune inflammatory rheumatic disease; SLE, systemic lupus erythematosus, JIA, juvenile idiopathic arthritis; IBD, inflammatory bowel disease.
